# Supplementary material
Source: publisher figshare collection journal article supplement (https://sage.figshare.com/ndownloader/files/18120791)
Supplement: Supplementary file 1 [file 18120791]

Our paper title, " Comparing with Regional Difference of Global Energy Performance ", is focused on evaluating global energy performance. We consider the physical characteristics of individual variables in inputs and outputs in directional, non-directional and undesirable, and utilize super SBM DDF-DEA approach to explore global energy efficiency. This study divides into America, Europe and Asia to find the regional difference, uses EPI data to understand the relationship between energy efficiency and environmental, and find some meaningful results in this paper.
